# Supplementary material for: Trends in Hospital Costs and Levels of Services Provided for Children With Bronchiolitis Treated in Children’s Hospitals
Source: PubMed Central journal article supplement (PMC8548950; doi:10.1001/jamanetworkopen.2021.29920), 2021-10-26
Supplement: jamanetwopen-e2129920-s001.pdf [file jamanetwopen-e2129920-s001.pdf]

## Supplementary Online Content

Willer RJ, Coon ER, Harrison WN, Ralston SL. Trends in hospital costs and levels of services provided for children with bronchiolitis treated in children's hospitals. *JAMA Netw Open*. 2021;4(10):e2129920. doi:10.1001/jamanetworkopen.2021.29920

**eTable 1.** Outcomes for the Preplanned Nested Subanalyses for Patients With Bronchiolitis in any Diagnosis Position

**eTable 2.** The Number of Patients, Proportion of Patients and Cumulative Proportion of Patients for each of the 10 most Common APR-DRGs for Patients With Bronchiolitis in any Diagnosis Position

This supplementary material has been provided by the authors to give readers additional information about their work.

**eTable 1.** Outcomes for the Preplanned Nested Subanalyses for Patients With Bronchiolitis in any Diagnosis Position. All outcomes were adjusted for age, sex, race, ethnicity and insurance status.

| Outcomes                               | 2010             | 2012             | 2014             | 2016             | 2018             | 2019             | P value for trend |
|----------------------------------------|------------------|------------------|------------------|------------------|------------------|------------------|-------------------|
| <b>Bronchiolitis APR-DRG (%)</b>       |                  |                  |                  |                  |                  |                  |                   |
| Without CCC                            | 81.9 (81.4-82.4) | 83.6 (83.2-84.1) | 80.2 (79.7-80.6) | 74.6 (74.2-75.1) | 69.7 (69.3-70.2) | 63.3 (62.9-63.8) | <.001             |
| Without CCC or MV                      | 83.9 (83.5-84.5) | 85.8 (85.4-86.2) | 82.2 (81.8-82.7) | 78.0 (77.5-78.4) | 72.7 (72.2-73.1) | 67.1 (66.6-67.6) | <.001             |
| Without CCC, MV, or ICU                | 84.7 (84.3-85.2) | 86.6 (86.1-87.0) | 84.2 (83.7-84.6) | 81.5 (81.0-82.0) | 77.6 (77.2-78.1) | 72.8 (72.4-73.3) | <.001             |
| <b>Respiratory Failure APR-DRG (%)</b> |                  |                  |                  |                  |                  |                  |                   |
| Without CCC                            | 1.1 (0.9-1.2)    | 1.2 (1.1-1.3)    | 3.3 (3.1-3.5)    | 9.3 (8.9-9.6)    | 15.2 (14.8-15.5) | 22.4 (22.0-22.7) | <.001             |
| Without CCC or MV                      | 0.4 (0.3-0.5)    | 0.6 (0.5-0.7)    | 2.5 (2.3-2.7)    | 7.5 (7.2-7.8)    | 13.6 (13.3-14.0) | 19.7 (19.3-20.1) | <.001             |
| Without CCC, MV, or ICU                | 0.1 (0.1-0.1)    | 0.1 (0.1-0.2)    | 1.0 (0.9-1.1)    | 4.3 (4.1-4.6)    | 8.4 (8.1-8.7)    | 13.7 (13.4-14.1) | <.001             |
| <b>APR-DRG SOI, % (95% CI)</b>         |                  |                  |                  |                  |                  |                  |                   |
| Bronchiolitis APR-DRG SOI 1            | 43.7 (43.2-44.2) | 42.9 (42.4-43.3) | 33.8 (33.4-34.3) | 36.6 (36.2-37.0) | 29.6 (29.2-29.9) | 27.7 (27.3-28.0) | <.001             |
| Bronchiolitis APR-DRG SOI 2            | 28.6 (28.2-29.1) | 30.1 (29.6-30.6) | 31.7 (31.2-32.2) | 22.2 (21.9-22.6) | 19.0 (18.6-19.3) | 16.7 (16.4-17.0) | <.001             |
| Bronchiolitis APR-DRG SOI 3            | 4.9 (4.7-5.1)    | 6.0 (5.8-6.3)    | 8.7 (8.4-9.0)    | 9.0 (8.8-9.3)    | 15.2 (14.8-15.5) | 13.8 (13.5-14.1) | <.001             |
| Bronchiolitis APR-DRG SOI 4            | 1.0 (0.9-1.1)    | 0.9 (0.8-1.0)    | 1.2 (1.1-1.3)    | 1.5 (1.4-1.6)    | 1.7 (1.6-1.8)    | 1.3 (1.2-1.4)    | <.001             |
| Respiratory Failure APR-DRG SOI 1      | 0.0 (0.0-0.0)    | 0.0 (0.0-0.0)    | 0.0 (0.0-0.0)    | 0.0 (0.0-0.0)    | 0.0 (0.0-0.0)    | 0.0 (0.0-0.0)    | .689              |
| Respiratory Failure APR-DRG SOI 2      | 0.4 (0.3-0.5)    | 0.6 (0.5-0.7)    | 2.0 (1.9-2.1)    | 6.5 (6.3-6.6)    | 11.0 (10.8-11.1) | 17.1 (16.9-17.2) | <.001             |

|                                        |                  |                  |                  |                  |                  |                  |       |
|----------------------------------------|------------------|------------------|------------------|------------------|------------------|------------------|-------|
| Respiratory Failure APR-DRG SOI 3      | 0.4 (0.3-0.5)    | 0.5 (0.4-0.5)    | 1.0 (0.9-1.1)    | 2.0 (1.9-2.1)    | 2.9 (2.7-3.0)    | 3.7 (3.5-3.8)    | <.001 |
| Respiratory Failure APR-DRG SOI 4      | 0.4 (0.3-0.4)    | 0.3 (0.2-0.3)    | 0.5 (0.4-0.5)    | 0.7 (0.6-0.8)    | 0.7 (0.6-0.8)    | 0.9 (0.8-0.9)    | <.001 |
| Other APR-DRG (%)                      | 20.8 (20.3-21.2) | 18.9 (18.4-19.3) | 20.9 (20.5-21.3) | 21.4 (21.0-21.8) | 20.2 (19.9-20.6) | 19.0 (18.7-19.4) | .528  |
| Hospital Length of Stay, days (median) |                  |                  |                  |                  |                  |                  |       |
| Without CCC                            | 2.0              | 2.0              | 2.0              | 2.0              | 2.0              | 2.0              | >.99  |
| Without CCC or MV                      | 2.0              | 2.0              | 2.0              | 2.0              | 2.0              | 2.0              | >.99  |
| Without CCC, MV, or ICU                | 2.0              | 2.0              | 2.0              | 2.0              | 2.0              | 2.0              | >.99  |
| ICU admission (%)                      |                  |                  |                  |                  |                  |                  |       |
| Without CCC                            | 10.0 (9.6-10.4)  | 12.9 (12.5-13.3) | 14.4 (14.0-14.8) | 18.9 (18.5-19.3) | 22.5 (22.0-22.9) | 24.1 (23.7-24.5) | <.001 |
| Without CCC or MV                      | 6.9 (6.5-7.2)    | 9.7 (9.4-10.1)   | 10.7 (10.3-11.1) | 13.8 (13.4-14.2) | 15.4 (15.1-15.8) | 16.7 (16.3-17.1) | <.001 |
| ICU Length of Stay, days (median)      |                  |                  |                  |                  |                  |                  |       |
| Without CCC                            | 2.7 (2.6-2.8)    | 2.6 (2.5-2.7)    | 2.5 (2.4-2.6)    | 2.5 (2.4-2.5)    | 2.3 (2.2-2.3)    | 2.2 (2.2-2.3)    | <.001 |
| Without CCC or MV                      | 2.0              | 2.0              | 2.0              | 2.0              | 2.0              | 2.0              | >.99  |
| Mechanical Ventilation (%)             |                  |                  |                  |                  |                  |                  |       |
| Invasive                               |                  |                  |                  |                  |                  |                  |       |
| Without CCC                            | 2.6 (2.4-2.8)    | 2.5 (2.4-2.7)    | 2.3 (2.2-2.5)    | 2.7 (2.5-2.9)    | 2.6 (2.4-2.7)    | 2.3 (2.1-2.4)    | .916  |
| Non-Invasive                           |                  |                  |                  |                  |                  |                  |       |
| Without CCC                            | 1.2 (1.1-1.4)    | 2.0 (1.8-2.2)    | 3.3 (3.1-3.5)    | 5.5 (5.2-5.7)    | 8.1 (7.9-8.4)    | 9.1 (8.8-9.4)    | <.001 |
| Mortality (%)                          |                  |                  |                  |                  |                  |                  |       |
| Without CCC                            | 0.0 (0.0-0.0)    | 0.0 (0.0-0.0)    | 0.0 (0.0-0.0)    | 0.0 (0.0-0.0)    | 0.0 (0.0-0.0)    | 0.0 (0.0-0.0)    | .564  |
| Without CCC or MV                      | 0.0 (0.0-0.0)    | 0.0 (0.0-0.0)    | 0.0 (0.0-0.0)    | 0.0 (0.0-0.0)    | 0.0 (0.0-0.0)    | 0.0 (0.0-0.0)    | .558  |
| Without CCC, MV, or ICU                | 0.0 (0.0-0.0)    | 0.0 (0.0-0.0)    | 0.0 (0.0-0.0)    | 0.0 (0.0-0.0)    | 0.0 (0.0-0.0)    | 0.0 (0.0-0.0)    | .461  |

**eTable 2.** The Number of Patients, Proportion of Patients and Cumulative Proportion of Patients for each of the 10 most Common APR-DRGs for Patients With Bronchiolitis in any Diagnosis Position

| APR-DRG | APR-DRG Description                                                  | Number of Patients | Proportion of Patients | Cumulative Proportion of Patients |
|---------|----------------------------------------------------------------------|--------------------|------------------------|-----------------------------------|
| 138     | Bronchiolitis and RSV pneumonia                                      | 274,138            | 71.04                  | 71.04                             |
| 133     | Respiratory Failure                                                  | 33,749             | 8.75                   | 79.79                             |
| 139     | Other Pneumonia                                                      | 15,487             | 4.01                   | 83.8                              |
| 132     | BPD & other chronic respiratory diseases arising in perinatal period | 8,546              | 2.21                   | 86.02                             |
| 130     | Respiratory system diagnosis with ventilator support 96+ hours       | 7,734              | 2                      | 88.02                             |
| 141     | Asthma                                                               | 6,551              | 1.7                    | 89.72                             |
| 113     | Infections of upper respiratory tract                                | 4,011              | 1.04                   | 90.76                             |
| 422     | Hypovolemia & related electrolyte disorders                          | 3,400              | 0.88                   | 91.64                             |
| 144     | Respiratory signs, symptoms & minor diagnoses                        | 3,298              | 0.85                   | 92.49                             |
| 724     | Other infectious & parasitic diseases                                | 3,212              | 0.83                   | 93.33                             |
